# Supplementary material
Source: PubMed Central journal article supplement (PMC6538425)
Supplement: NIHMS1002747-supplement-Supp_figS1-5.pdf [file NIHMS1002747-supplement-Supp_figS1-5.pdf]

## Supplemental Figure S1

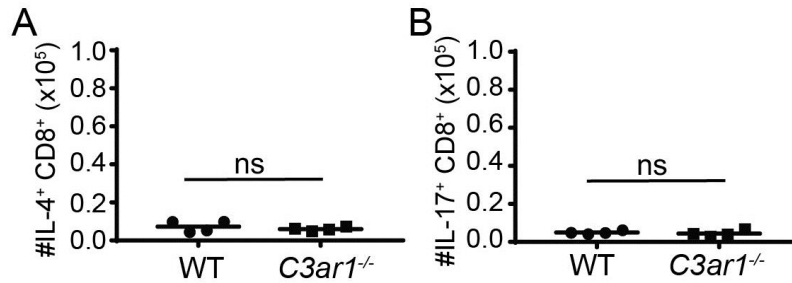

**Figure S1.** Absence of recipient C3aR1 does not result in IL-17 or IL-4 production by CD8<sup>+</sup> T cells. Spleen cells were isolated from B6 WT and *C3ar1*<sup>-/-</sup> recipients of BALB/c heart grafts isolated on day 6 post-transplant (as in Figure 1), stimulated with BALB/c (donor-origin) APCs, and stained for intracellular expression of IL-4 (A) and IL-17 (B) and analyzed by flow cytometry gated on recipient CD8<sup>+</sup> T cells. Total numbers of cytokine producing cells per spleen are shown. n=4/group; ns= not significant.

# Supplemental Figure S2

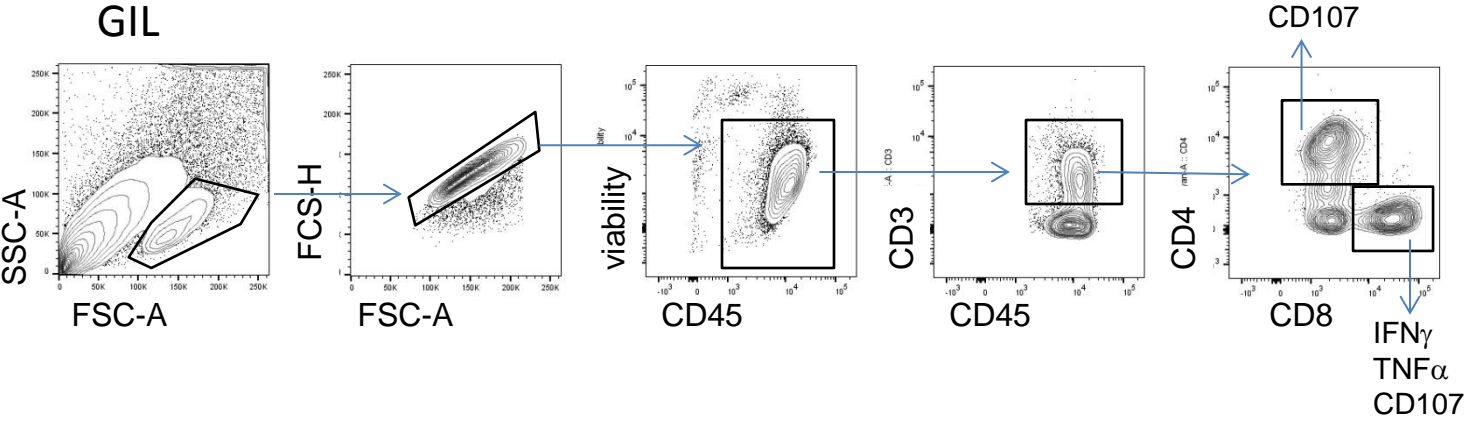

**Figure S2.** Gating strategy for detection of cytokine producing and CD107a/b<sup>+</sup> CD8<sup>+</sup> T cells from within graft infiltrating lymphocytes (GIL).

# Supplemental Figure S3

(legend on next page)

**A**

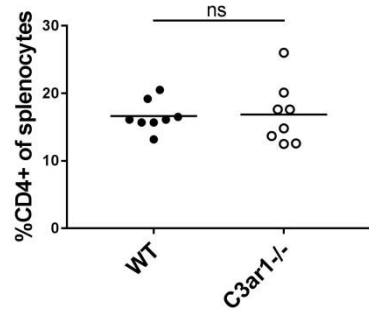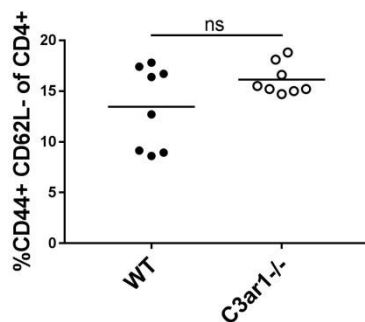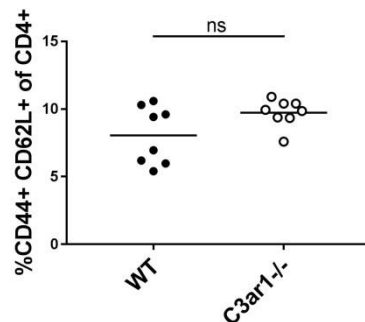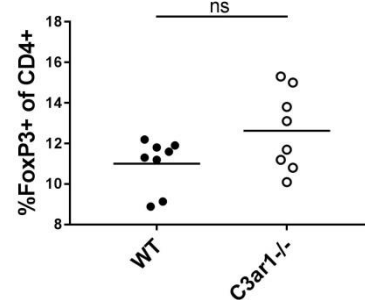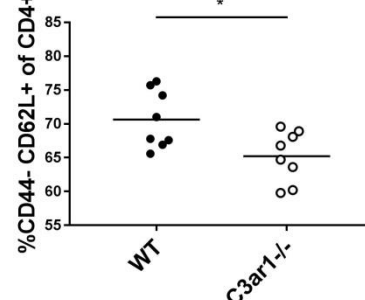

**B**

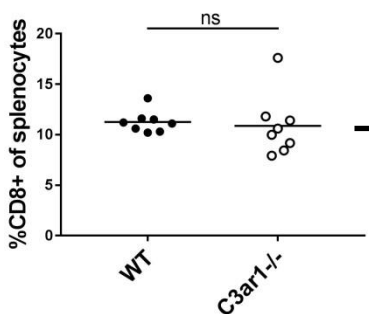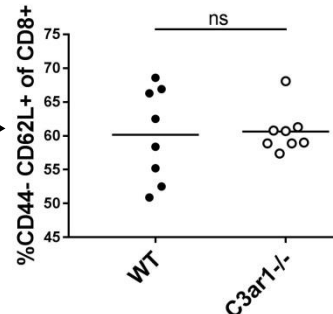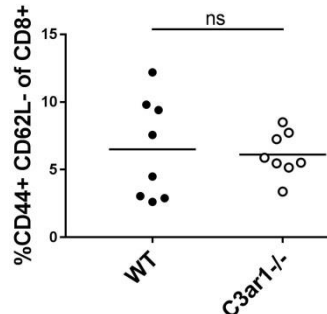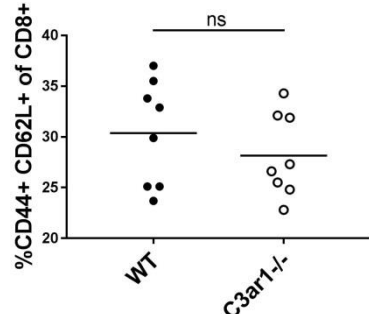

**C**

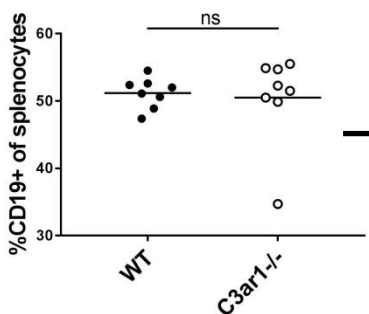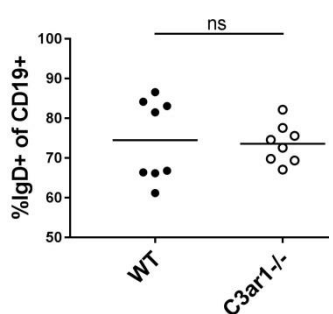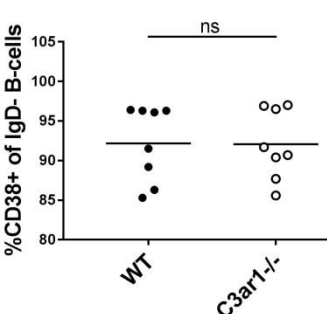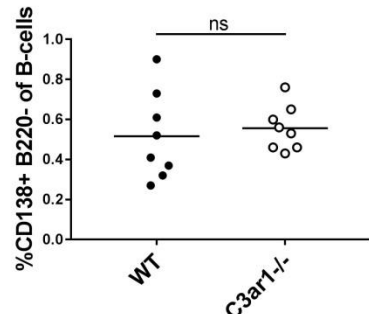

**D**

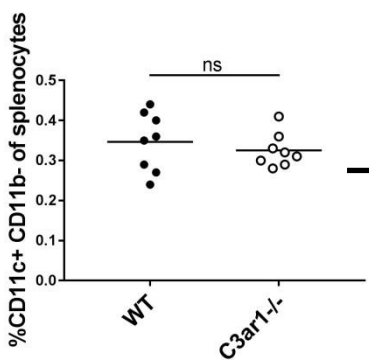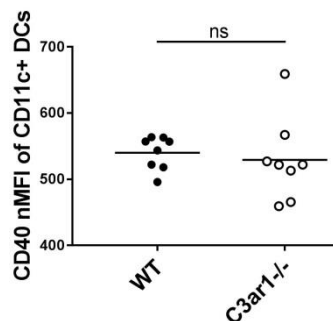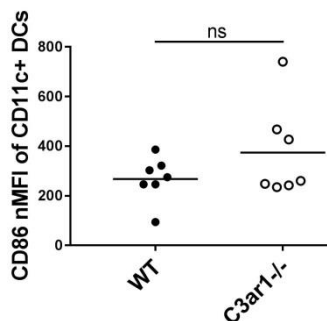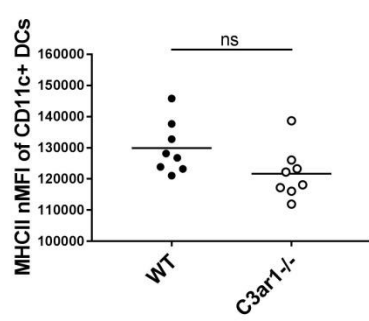

**Figure S3.** Immunophenotyping of naïve B6 WT and *C3ar1*<sup>-/-</sup> mice. Animals are bred at Mount Sinai in the same room and cohoused. Spleen cells were obtained from male and female mice 6-12 weeks of age and analyzed by flow cytometry for CD4<sup>+</sup> T cells and subsets (A), CD8<sup>+</sup> T cells and subsets (B), B cell subsets (C) and costimulatory molecule expression on CD11c<sup>hi</sup>CD11b<sup>-</sup> DCs (D). n=eight per group, ns=not significant, \*p<0.05

## Supplemental Figure S4

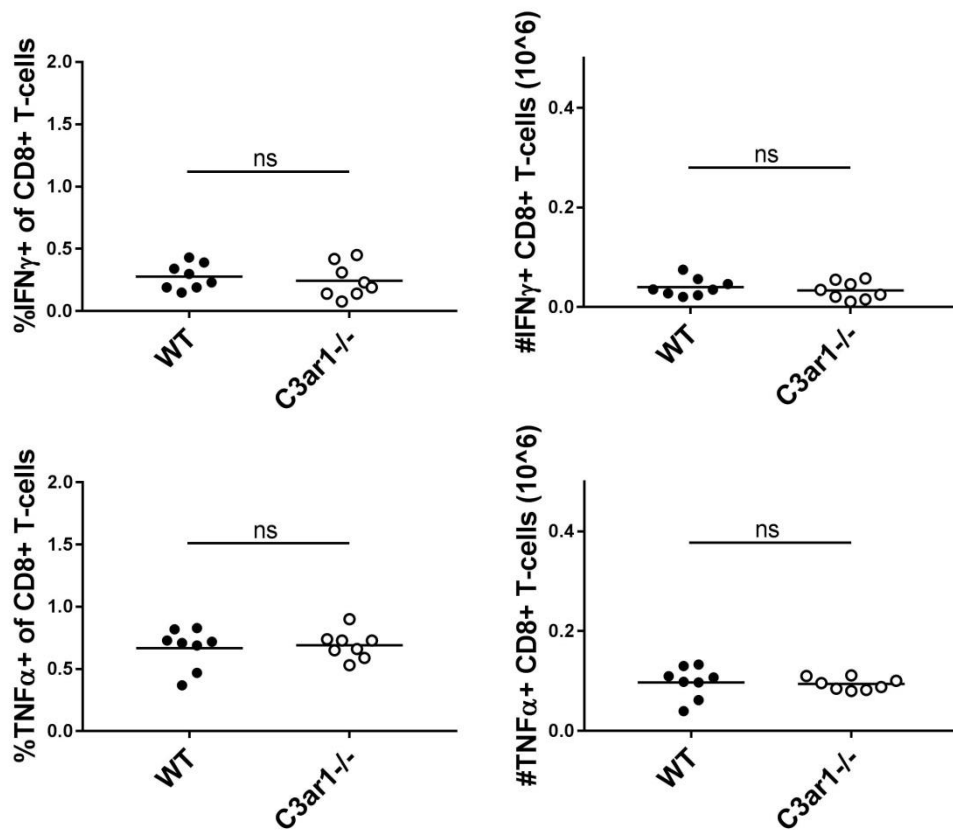

**Figure S4.** Baseline frequencies of cytokine producing alloreactive CD8<sup>+</sup> T cells are similar in B6 WT and C3ar1<sup>-/-</sup> mice. Splens cells from naïve animals analyzed in Supplemental Figure S3 were stimulated in vitro with allogeneic BALB/c APCs, stained for intracellular IFN $\gamma$  or TNF $\alpha$  and analyzed by flow cytometry. Graphs depict percentages (left panels) and total numbers of donor-reactive IFN $\gamma$ - (top) and TNF $\alpha$ - (bottom) producing CD8<sup>+</sup> T cells per spleen. n=8/group, ns=not significant.

## Supplemental Figure S5

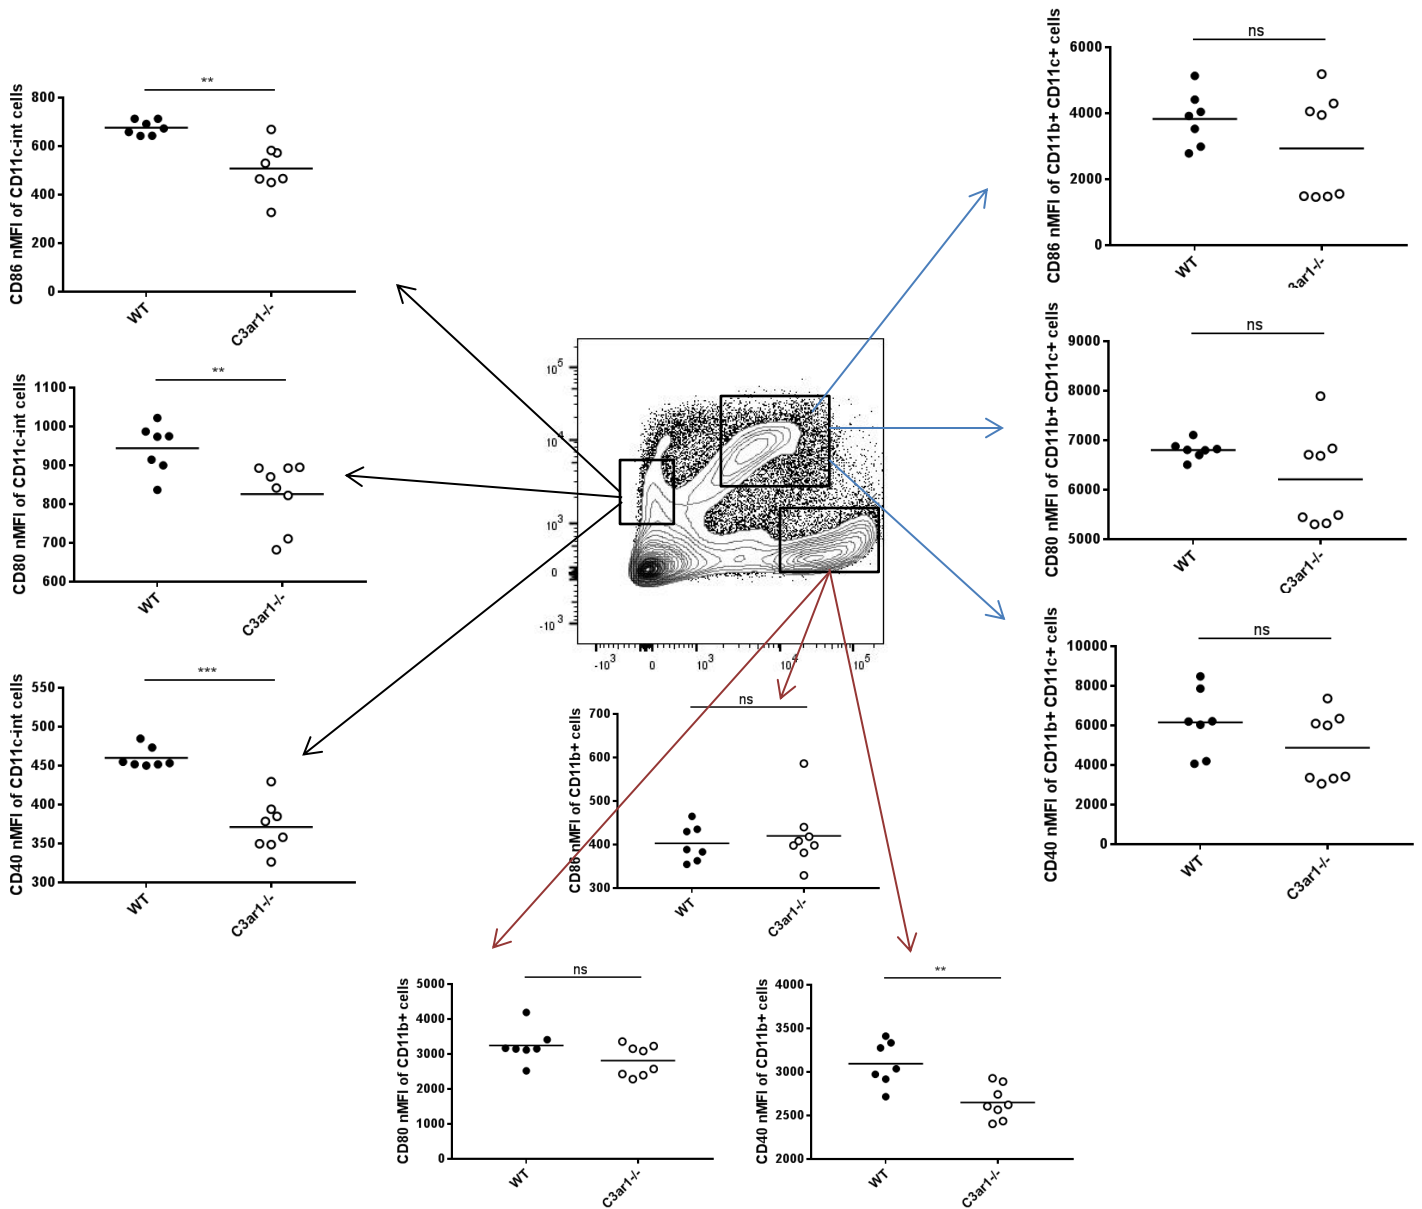

**Figure S5.** Costimulatory molecule expression on DC and monocyte subsets in transplanted WT and *C3ar1*<sup>-/-</sup> mice. Quantification of MFI (bottom) showing expression of costimulatory molecules CD40 CD80, and CD86, gated on the splenic dendritic cell subsets in WT or *C3ar1*<sup>-/-</sup> B6 recipients of BALB/c heart grafts 1 day post-transplantation from experiments depicted in Figure 6. n = 8/condition, ns=not significant, \*\*p<0.01, \*\*\*p<0.001.
